# Supplementary material for: A droplet-based microfluidic process to produce yarn-ball-shaped hydrogel microbeads
Source: Royal Society of Chemistry journal article supplement (doi:10.1039/c3ra41747f), 2013-01-01
Supplement: c3ra41747f.pdf [file c3ra41747f.pdf]

## Supplementary Information

for

# A droplet-based microfluidic process to produce yarn-ball-shaped hydrogel microbeads

Ayaki Miyama, Masumi Yamada\*, Sari Sugaya, and Minoru Seki

Department of Applied Chemistry and Biotechnology,  
Graduate School of Engineering, Chiba University  
1-33 Yayoi-cho, Inage-ku, Chiba 263-8522, Japan.

\*E-mail: [m-yamada@faculty.chiba-u.jp](mailto:m-yamada@faculty.chiba-u.jp); Tel&Fax: +81-43-290-3398

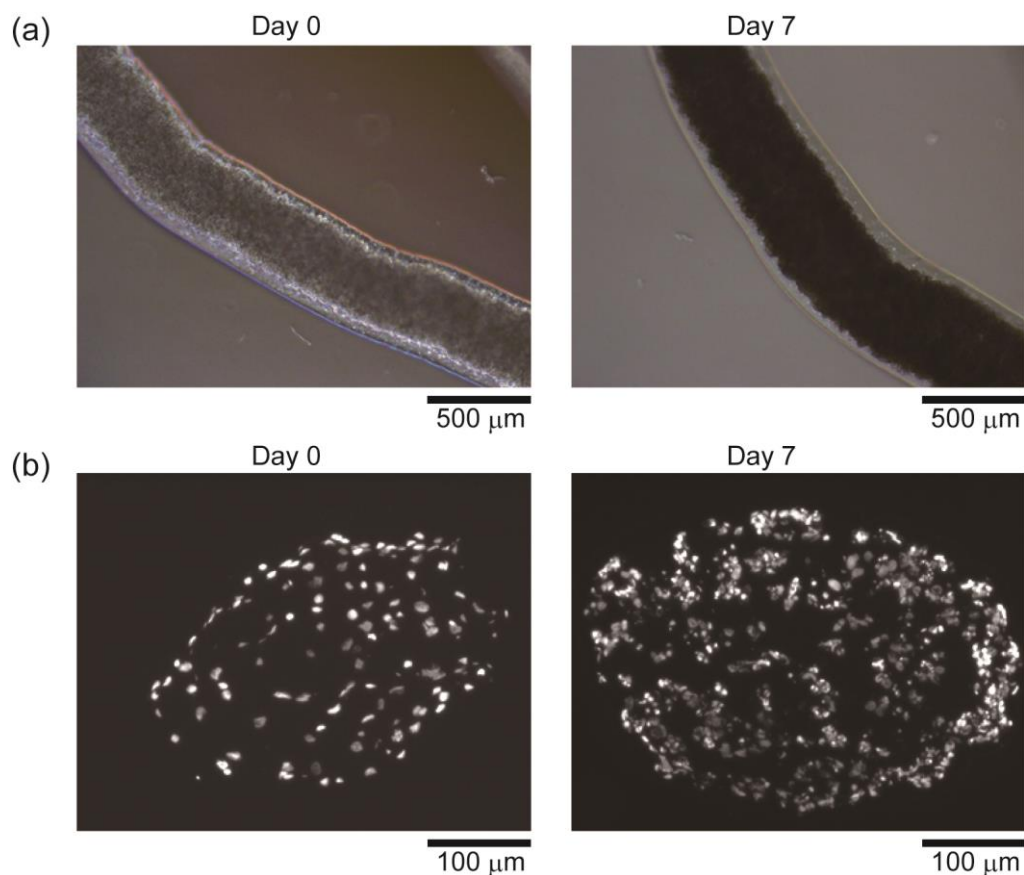

Figure S1. Cultivation of HeLa cells in a homogeneous Ca-alginate hydrogel fiber as a control experiment. HeLa cells were suspended in 1% sodium alginate (NaA) solution at a concentration of  $3 \times 10^7$  cells  $\text{mL}^{-1}$ . The cell suspension was extruded through a 27G syringe needle directly into a gelation solution (10% dextran solution with 20 mM  $\text{CaCl}_2$ ). The hydrogel surface was coated with poly-L-lysine membrane as in the case of the yarn-ball-shaped beads. (a) Micrographs of HeLa cell-incorporating hydrogel fibers with an average diameter of  $\sim 450$   $\mu\text{m}$ , after 0 and 7 days of cultivation. (b) Fluorescence images showing the cross sections of the cell-incorporating hydrogel fiber, before and after cultivation for 7 days. Frozen sections (5  $\mu\text{m}$  thickness) were prepared by using a cryostat, and the cell nuclei were stained by 4',6-diamidino-2-phenylindole (DAPI). The cell density after 7 days of cultivation was increased  $\sim 3.1$ -fold, which was measured by counting the cells in 10 sections.
